# Supplementary material for: Prosthetic energy return during walking increases after 3 weeks of adaptation to a new device
Source: Springer Nature journal article supplement (doi:10.1186/s12984-018-0347-1), 2018-01-27
Supplement: MOESM1 [file 15419262]

|                                                                |                   | <u>Week 0</u> | <u>Week 1.5</u> | <u>Week 3</u> | <u>p-value</u> |
|----------------------------------------------------------------|-------------------|---------------|-----------------|---------------|----------------|
| <b>Ankle-Foot Work Ratio<br/>(positive work/negative work)</b> | <b>Prosthesis</b> | 0.482 ± 0.091 | 0.493 ± 0.093   | 0.495 ± 0.081 | 0.193          |
|                                                                | <b>Sound</b>      | 0.732 ± 0.293 | 0.722 ± 0.264   | 0.745 ± 0.291 | 0.612          |
| <b>Stride Length (m)</b>                                       | <b>Prosthesis</b> | 1.333 ± 0.232 | 1.358 ± 0.226   | 1.357 ± 0.222 | 0.362          |
|                                                                | <b>Sound</b>      | 1.321 ± 0.207 | 1.346 ± 0.221   | 1.373 ± 0.223 | *0.024         |
| <b>Stance time (seconds)</b>                                   | <b>Prosthesis</b> | 0.750 ± 0.079 | 0.731 ± 0.071   | 0.732 ± 0.072 | *0.029         |
|                                                                | <b>Sound</b>      | 0.753 ± 0.079 | 0.736 ± 0.075   | 0.736 ± 0.074 | 0.059          |

**Additional file 1:** Ankle-foot work ratio (positive/negative work), stride length, and stance time were examined during the 3 week adaptation period. One factor repeated measures ANOVA was used to examine the effects of visits on the outcome variables. \*denotes statistical significance ( $p < 0.05$ )
